# Supplementary material for: Physicochemical characterization to assess Ni and Zn incorporation into zeotype SAPO-34 nanoparticles synthesized with different mixing methods through ultrasound-promoted crystallization
Source: Royal Society of Chemistry journal article supplement (doi:10.1039/c7ra00272f), 2017-01-01
Supplement: c7ra00272f1.pdf [file c7ra00272f1.pdf]

## Supplementary Information

### Physicochemical characterization to assess Ni and Zn incorporation into zeotype SAPO-34 nanoparticles synthesized with different mixing methods through ultrasound-promoted crystallization

F. Marzpour Shalmani<sup>a</sup>, R. Halladj<sup>a,\*</sup> and S. Askari<sup>b</sup>

<sup>a</sup> Faculty of Chemical Engineering, Amirkabir University of Technology (Tehran Polytechnic), P.O. Box 15875-4413, Hafez Ave., Tehran, Iran.

<sup>b</sup> Department of Chemical Engineering, Science and Research Branch, Islamic Azad University, Tehran, Iran.

\*Corresponding author: Dr. Rouein Halladj; E-mail address: [halladj@aut.ac.ir](mailto:halladj@aut.ac.ir)

| <b><u>Table of Contents</u></b>                                                                                                            | <b><u>Page</u></b> |
|--------------------------------------------------------------------------------------------------------------------------------------------|--------------------|
| <b>Table S1:</b> Characterization techniques of the synthesized samples.                                                                   | <b><u>S2</u></b>   |
| <b>Fig. S1:</b> XRD patterns of parent (S-2), nickel (Ni-8), and zinc (Zn-8) containing SAPO-34 samples synthesized hydrothermally for 5h. | <b><u>S3</u></b>   |
| <b>Unit cell calculation</b>                                                                                                               | <b><u>S4</u></b>   |
| <b>Fig. S2:</b> Schematic representation of chabazite (CHA) framework in the unit cell.                                                    | <b><u>S4</u></b>   |
| <b>References</b>                                                                                                                          | <b><u>S5</u></b>   |

**Table S1.** Characterization techniques of the synthesized samples.

| Subject to measure                                       | Measurement method                                                | Instrument                      | Remarks                                                                                                             |
|----------------------------------------------------------|-------------------------------------------------------------------|---------------------------------|---------------------------------------------------------------------------------------------------------------------|
| Crystal phase, crystallinity, and crystallite size       | XRD (Powder X-ray diffraction)                                    | Equinox 3000                    | operated at 40 kV and 30 mA with a Cu K $\alpha$ X-ray source ( $\lambda=1.541874\text{\AA}$ ) at room temperature. |
| Crystal size and morphology                              | SEM (Scanning electron microscopy)                                | VEGA\\ TESCAN                   | equipped with an energy dispersive X-ray spectrometer.                                                              |
|                                                          | TEM (Transmission electron microscopy)                            | Philips, CM30                   | operated at 300 kV.                                                                                                 |
| Elemental analysis                                       | EDX (Energy dispersive X-ray)                                     | VEGA\\ TESCAN                   |                                                                                                                     |
| Coordination state of metal                              | UV-Vis DRS (Ultraviolet visible-Diffuse reflectance spectroscopy) | Avantes, AvaSpec-ULS3648        | BaSO <sub>4</sub> was used as the reflectance standard.                                                             |
| Framework structures, active sites, and adsorbed species | FTIR (Fourier transform infrared spectroscopy)                    | Thermo Scientific, Nicolet iS10 | operated at room temperature with KBr pellet.                                                                       |
| Changes in weight of material                            | TGA (Thermo-gravimetric analysis)                                 | Shimadzu, TGA-50                | recorded under air with a heating rate of 20°C/min.                                                                 |

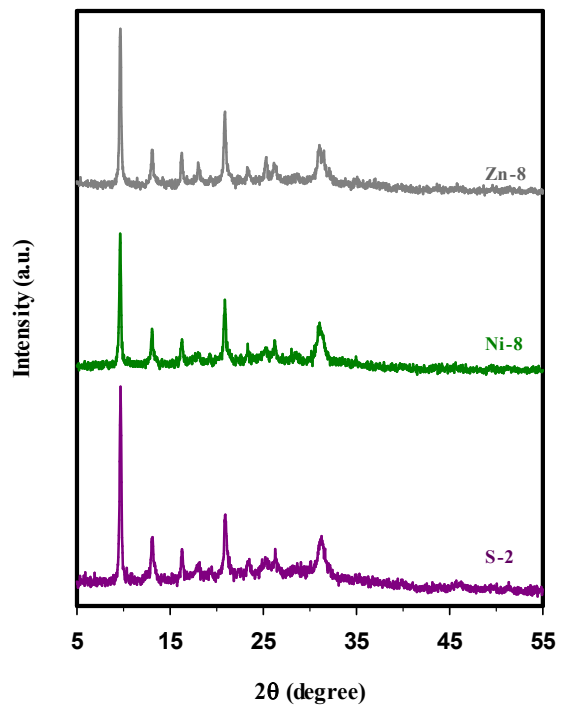

**Fig. S1.** XRD patterns of parent (S-2), nickel (Ni-8), and zinc (Zn-8) containing SAPO-34 samples synthesized hydrothermally for 5h.

## Unit cell calculation

In an attempt to calculate the unit cell parameters, the type of crystal system in a sample of interest should be initially specified and thereafter lattice parameters are determined according to the type of crystal structure. A detailed investigation on the SAPO-34 lattice parameters ( $a$ ,  $b$ ,  $c$ ,  $\alpha$ ,  $\beta$ , and  $\gamma$ ) reveals that SAPO-34 is made up of a unit cell with the hexagonal crystal structure. It is known that [1] in hexagonal crystal system, a unit cell is given by a rectangular prism with a vertical axis,  $c$ , perpendicular to a rhombus-shaped base and the equal edges of which are at  $60^\circ$  and  $120^\circ$  with respect to each other. The length of the rhombus edge is designated by two equal vectors,  $a$  and  $b$ , (i.e.  $a = b \neq c$ ,  $\alpha = \beta = 90^\circ$ ,  $\gamma = 120^\circ$ ), as shown in Fig. S2.

The unit cell parameters are measured by analysis of the powder diffraction data, according to the following equation based on the hexagonal crystal system [1]:

$$\frac{1}{d^2} = \frac{4 \sin^2 \theta}{\lambda^2} = \frac{4}{3} \left( \frac{h^2 + hk + k^2}{a^2} \right) + \frac{l^2}{c^2}$$

where  $a$  and  $c$  represent the unit cell parameters,  $d$ -spacing is the distance between similar atomic planes,  $\theta$  is the diffraction angle,  $\lambda$  is the wavelength of the incident X-ray, and  $(h, k, l)$  are the Miller indices.

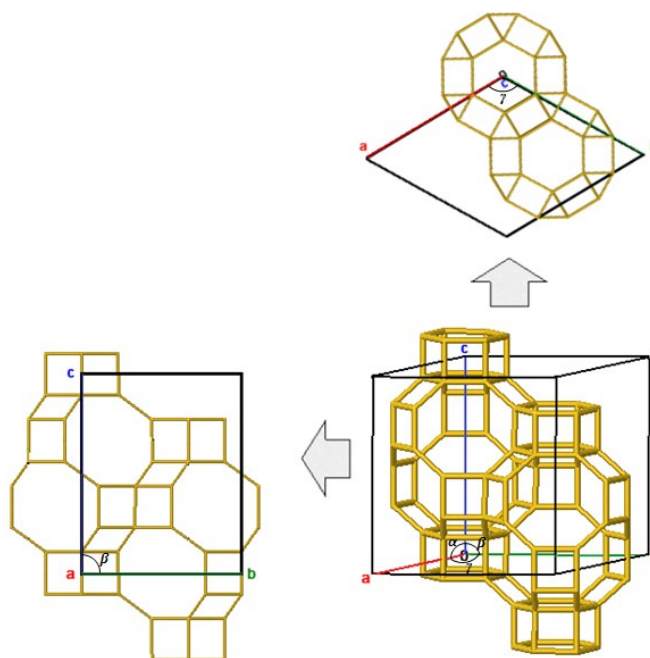

**Fig. S2.** Schematic representation of chabazite (CHA) framework in the unit cell (Adapted from the IZA database, namely [www.iza-online.org](http://www.iza-online.org)).

## **References**

1. Y. Waseda, E. Matsubara, K. Shinoda, *X-Ray Diffraction Crystallography (Introduction, examples and solved problems)*, Springer, Heidelberg Dordrecht, London, New York, 2011.
